# Supplementary material for: Lower Geriatric Nutritional Risk Index (GNRI) Is Associated with Higher Risk of Fractures in Patients Undergoing Hemodialysis
Source: MDPI journal article supplement (doi:10.3390/nu13082847), 2021-08-19
Supplement: s1 [file s1]

**Table S1.** Clinical characteristics by *GNRI* of all patients.

| Variables                      | <i>GNRI</i>    |               | <i>p</i> Value |
|--------------------------------|----------------|---------------|----------------|
|                                | ≥92 (n = 960)  | <92 (n = 382) |                |
| Age, years                     | 63.7 ± 12.0    | 71.6 ± 11.8   | <0.001         |
| Male, n (%)                    | 631 (65.7)     | 202 (52.9)    | <0.001         |
| Dialysis vintage, months       | 73 (28–143)    | 68 (30–132)   | 0.604          |
| Diabetes mellitus, n (%)       | 363 (38.2)     | 119 (31.6)    | 0.025          |
| Smokers (ever, current), n (%) | 493 (51.4)     | 176 (46.3)    | 0.090          |
| Dry weight, kg                 | 58.3 ± 11.4    | 48.0 ± 10.1   | <0.001         |
| Hemoglobin level, g/dL         | 10.9 ± 1.1     | 10.6 ± 1.2    | <0.001         |
| CRP level, mg/L                | 0.8 (0.5–2.3)  | 1.4 (0.5–5.6) | <0.001         |
| Total cholesterol level, mg/dL | 158.5 ± 31.9   | 154.8 ± 35.7  | 0.017          |
| Cr level, mg/dL                | 11.1 ± 2.8     | 9.0 ± 2.3     | <0.001         |
| Ca level, mg/dL                | 9.1 ± 0.7      | 8.8 ± 0.8     | 0.003          |
| Pi level, mg/dL                | 5.3 ± 1.3      | 5.0 ± 1.4     | <0.001         |
| ALP level, U/L                 | 223 (175–287)  | 254 (188–318) | 0.001          |
| Intact-PTH level, pg/mL        | 122.2 (68–189) | 113 (51–169)  | 0.002          |
| Use of statins, n (%)          | 206 (21.4)     | 56 (14.7)     | 0.005          |
| Use of VDRAs, n (%)            | 587 (61.2)     | 229 (60.0)    | 0.670          |
| Use of Pi-binders, n (%)       | 804 (83.8)     | 269 (73.0)    | <0.001         |
| Use of ESAs, n (%)             | 861 (89.7)     | 356 (93.1)    | 0.046          |

Data are presented as mean ± standard deviation or median (interquartile range) for continuous variables. Differences between groups were analyzed using the Mann-Whitney U test or chi-squared test. Abbreviations: *GNRI*, geriatric nutritional risk index; CRP, C-reactive protein; Cr, creatinine; Ca, calcium; Pi, phosphate; ALP, alkaline phosphatase; intact-PTH, intact parathyroid hormone; VDRAs, vitamin D receptor activators; ESAs, erythropoiesis-stimulating agents.

**Table S2.** Odds ratios and 95% CI for factors predicting a *GNRI* of <92.

| Variable                            | Odds ratio       | <i>p</i> Value |
|-------------------------------------|------------------|----------------|
| Intercept                           |                  | <0.001         |
| Age, ≥67 years                      | 1.98 (1.49–2.64) | <0.001         |
| Sex, male                           | 0.59 (0.42–0.83) | 0.002          |
| Dialysis vintage, ≥73 months        | 1.43 (1.00–1.81) | 0.048          |
| Diabetes mellitus, presence         | 0.61 (0.45–0.82) | 0.001          |
| Smokers (ever, current), presence   | 1.16 (0.85–1.58) | 0.358          |
| Hemoglobin level, ≥10.9 g/dL        | 0.81 (0.62–1.06) | 0.124          |
| CRP level, ≥1.0 mg/L                | 1.59 (1.21–2.09) | <0.001         |
| Total cholesterol level, ≥156 mg/dL | 0.68 (0.51–0.90) | 0.007          |
| Cr level, ≥10.5 mg/dL               | 0.32 (0.23–0.45) | <0.001         |
| Ca level, ≥9.1 mg/dL                | 0.55 (0.41–0.73) | <0.001         |
| Pi level, ≥5.2 mg/dL                | 0.92 (0.69–1.21) | 0.534          |
| ALP level, ≥230 U/L                 | 1.37 (1.04–1.81) | 0.027          |
| Intact-PTH level, ≥118 pg/mL        | 0.76 (0.57–1.01) | 0.061          |
| Use of statins, presence            | 0.56 (0.39–0.82) | 0.003          |
| Use of VDRAs, presence              | 1.06 (0.80–1.40) | 0.680          |
| Use of Pi-binders, presence         | 0.81 (0.58–1.13) | 0.213          |
| Use of ESAs, presence               | 1.17 (0.71–1.93) | 0.536          |

The adjusted  $R^2$  of the model was 0.157. Categories for age, dialysis vintage, and levels of hemoglobin, CRP, total cholesterol, Cr, Ca, Pi, ALP, and intact-PTH were calculated in accordance with the median value of the group.

Abbreviations: CRP, C-reactive protein; Cr, creatinine; Ca, calcium; Pi, phosphate; ALP, alkaline phosphatase; intact-PTH, intact parathyroid hormone; VDRAs, vitamin D receptor activators; ESAs, erythropoiesis-stimulating agents.

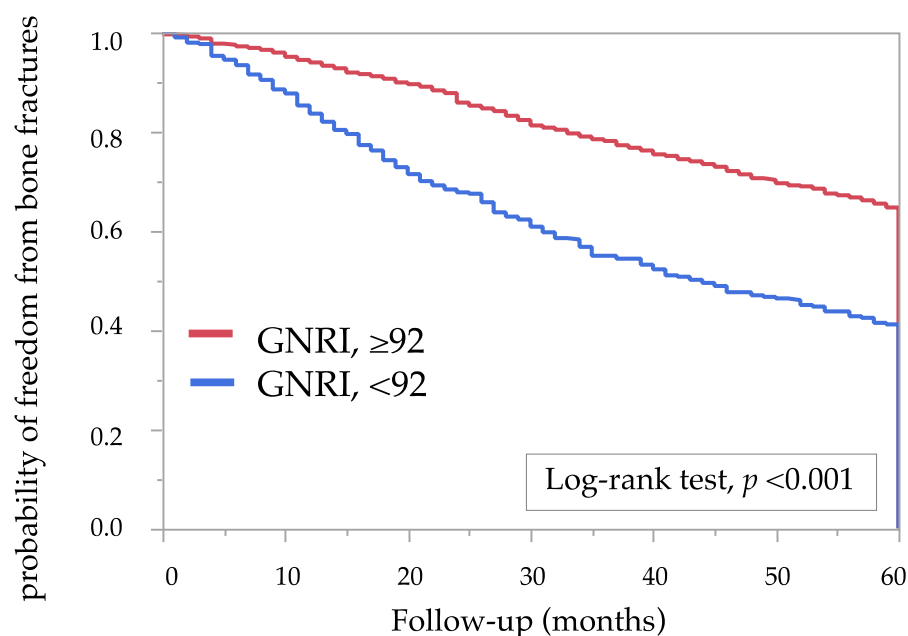

**Figure S1.** Kaplan-Meier estimates of the probability of freedom from bone fractures according to two GNRI groups. The log-rank test was used in analysis. A two-tailed  $p < 0.05$  was considered statistically significant. Abbreviations: GNRI, geriatric nutritional risk index.

**Table S3.** Hazard ratios for bone fractures.

| Univariate                        | HR (95% CI)      | <i>p</i> Value |
|-----------------------------------|------------------|----------------|
| GNRI, <92                         | 3.21 (2.20–4.70) | <0.001         |
| Covariate                         | HR (95% CI)      | <i>p</i> Value |
| Age, ≥67 years                    | 1.83 (1.21–2.77) | 0.004          |
| Sex, male                         | 0.52 (0.33–0.82) | 0.005          |
| Dialysis vintage, ≥73 months      | 0.88 (0.58–1.32) | 0.536          |
| Smokers (ever, current), presence | 0.73 (0.46–1.15) | 0.176          |
| CRP level, ≥1.0 mg/L              | 1.00 (0.68–1.48) | 0.991          |
| Ca level, ≥9.1 mg/dL              | 0.92 (0.60–1.40) | 0.692          |
| Pi level, ≥5.2 mg/dL              | 1.37 (0.92–2.04) | 0.122          |
| ALP level, ≥230 U/L               | 1.17 (0.78–1.77) | 0.445          |
| Intact-PTH level, ≥118 pg/mL      | 0.81 (0.54–1.21) | 0.309          |
| Use of VDRAs, presence            | 1.18 (0.79–1.76) | 0.425          |
| Use of Pi-binders, presence       | 0.59 (0.38–0.92) | 0.020          |
| GNRI, <92                         | 2.33 (1.54–3.52) | <0.001         |

The presented HRs are for bone fractures. Categories for age, dialysis vintage, levels of CRP, Ca, Pi, ALP, and intact-PTH, and GNRI were calculated in accordance with the median value of the group. Abbreviations: CRP, C-reactive protein; Ca, calcium; Pi, phosphate; ALP, alkaline phosphatase; intact-PTH, intact parathyroid hormone; VDRAs, vitamin D receptor activators; GNRI, geriatric nutritional risk index.
